# Supplementary material for: Stress-Relieving Carboxylated Polythiophene/Single-Walled Carbon Nanotube Conductive Layer for Stable Silicon Microparticle Anodes in Lithium-Ion Batteries
Source: PubMed Central journal article supplement — ACS Appl Energy Mater. 2024 Aug 28;7(17):7220–31. doi: 10.1021/acsaem.4c01132 (PMC11388140; doi:10.1021/acsaem.4c01132), 2024-08-28
Supplement: ae4c01132_si_001.pdf [file ae4c01132_si_001.pdf]

Supporting information

## **Stress-relieving Carboxylated Polythiophene/Single-Walled Carbon Nanotube Conductive Layer for Stable Silicon Microparticle Anodes in Lithium-Ion Batteries**

Donghee Gueon<sup>a‡</sup>, Haoze Ren<sup>a‡</sup>, Zeyuan Sun<sup>a</sup>, Bar Mosevitzky Lis<sup>a</sup>, Dang D. Nguyen<sup>a</sup>, Esther S. Takeuchi<sup>b,c,d,e</sup>, Amy C. Marschilok<sup>b,c,d,e</sup>, Kenneth J. Takeuchi<sup>b,c,d,e</sup>, Elsa Reichmanis<sup>\*a</sup>

<sup>a</sup> Department of Chemical and Biomolecular Engineering, Lehigh University, Bethlehem, PA, 18015, United States

<sup>b</sup> Interdisciplinary Science Department, Brookhaven National Laboratory, Upton, New York, 11973, United States

<sup>c</sup> Institute of Energy: Sustainability, Environment and Equity, Stony Brook University, Stony Brook, New York, 11794, United States

<sup>d</sup> Department of Material Science and Chemical Engineering, Stony Brook University, Stony Brook, New York, 11794, United States

<sup>e</sup> Department of Chemistry, Stony Brook University, Stony Brook, New York, 11794, United States

\*Corresponding Author: Elsa Reichmanis, [elr420@lehigh.edu](mailto:elr420@lehigh.edu)

‡D.G and H.R contributed equally to this paper.

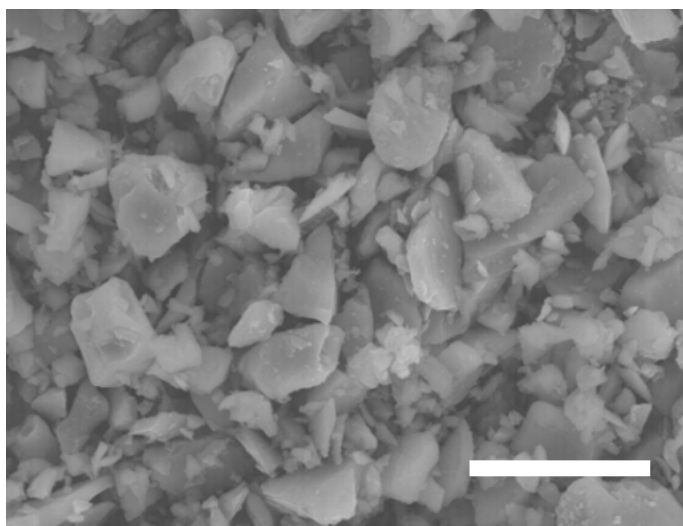

**Figure S1.** SEM image of silicon micro-particles (Si MPs). (Scale bar: 10  $\mu\text{m}$ )

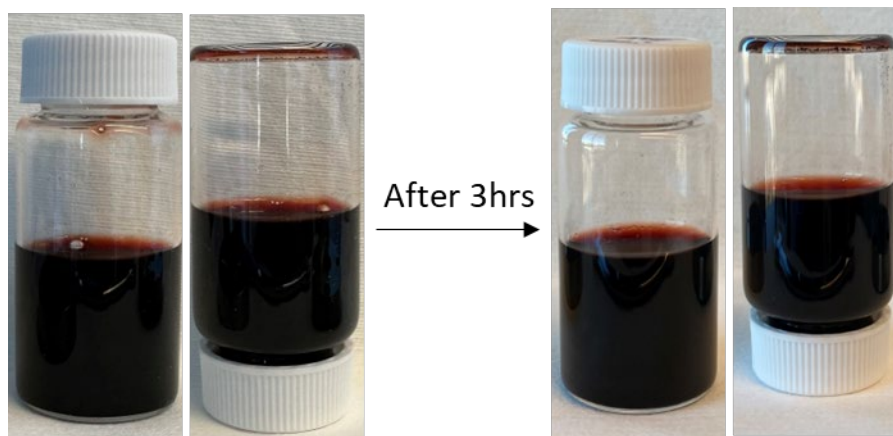

**Figure S2.** Well dispersed poly[3-(potassium-4-butanoate)thiophene]/ single-walled carbon nanotubes (PPBT/SWNT).

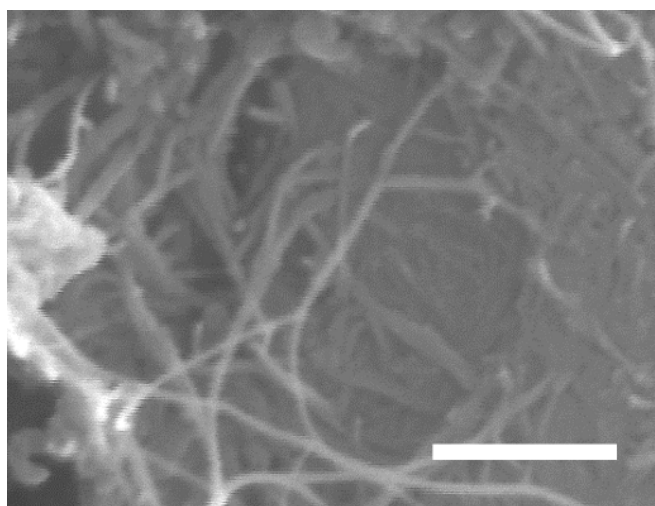

**Figure S3.** SEM image of PPBT/SWNT powder. (Scale bar: 200 nm)

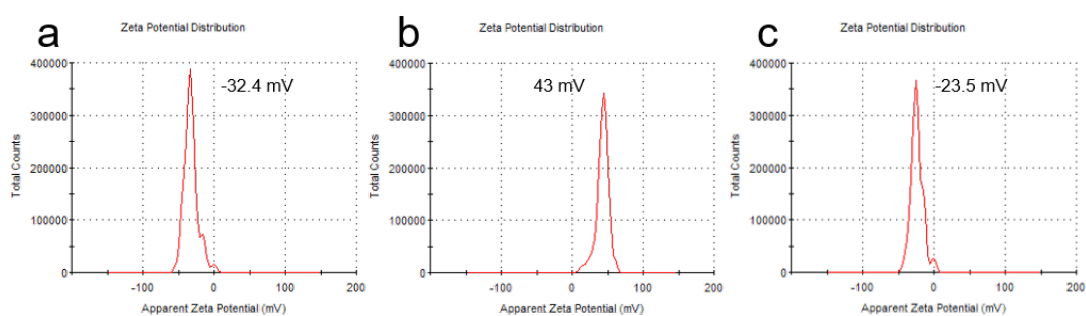

**Figure S4.** Zeta potential distributions of (a) Si MPs, (b) Poly (diallyldimethylammonium chloride) pretreated Si MPs, and (c) PPBT/SWNT@Si MPs.

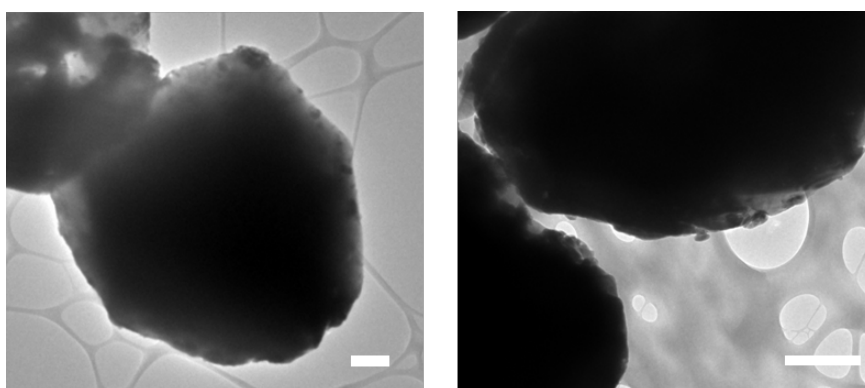

**Figure S5.** Transmission electron microscopy (TEM) images of Si MPs. (Scale bar: 500 nm)

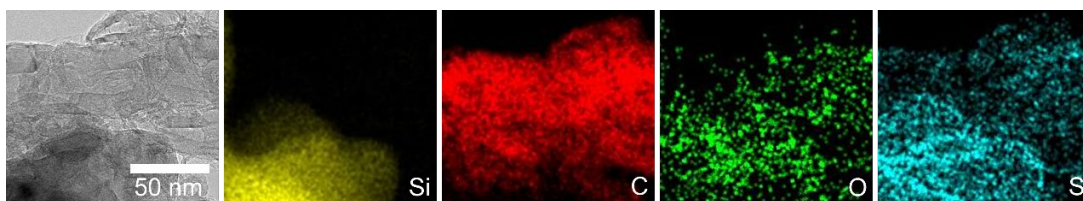

**Figure S6.** TEM images of PPBT/SWNT@Si MPs and the Energy Dispersive Spectroscopy (EDS) mapping images.

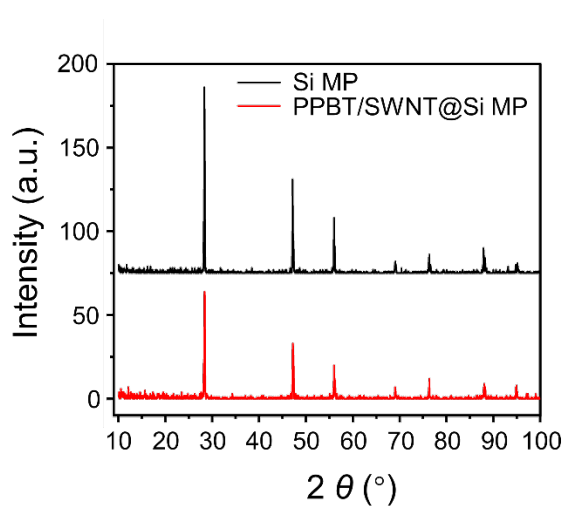

**Figure S7.** X-Ray diffraction analysis pattern of Si MP and PPBT/SWNT@Si MP.

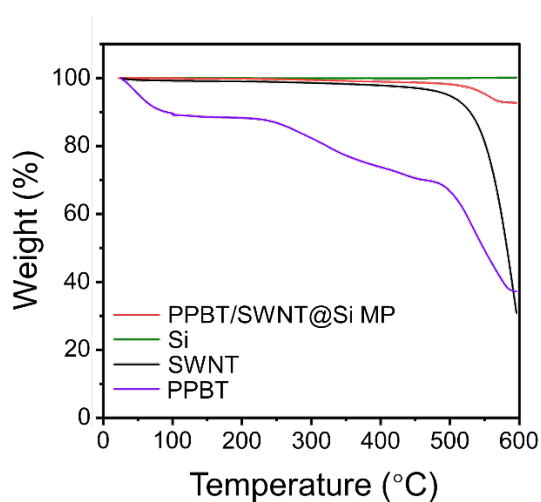

**Figure S8.** TGA profile. The TGA tests were carried out in air in the temperature range of 25-600 °C at a heating rate of 10 °C/min.

**Table S1.** material weight before and after the TGA test.

| Material         | Before TGA | After TGA | Mass residual ratio |
|------------------|------------|-----------|---------------------|
| PPBT/SWNT@Si MPs | 14.33 mg   | 13.29 mg  | 92.72 %             |
| Si MPs           | 20.82 mg   | 20.85 mg  | 100.15 %            |
| PPBT             | 6.73 mg    | 2.50 mg   | 37.21 %             |
| SWNT             | 6.11 mg    | 1.88 mg   | 30.86 %             |

Calculation:

In PPBT/SWNT@Si MPs before TGA analysis, the Si MP weight is  $x$  mg, the SWNT weight is  $\frac{x*0.01}{0.27}$  mg, and the PPBT weight is  $y$  mg.

Based on the TGA data the following equation can be obtained:

$$x + \frac{x*0.01}{0.27} + y = 14.33 \quad \text{(Equation S1)}$$

$$x * 100.15\% + \frac{x*0.01}{0.27} * 30.86\% + y * 37.21\% = 13.29 \quad \text{(Equation S2)}$$

The Si MP weight in PPBT/SWNT@Si MPs can be calculated based on the previous two equations. Then, the weight ratio of Si MPs in PPBT/SWNT@Si MPs can be calculated based on  $\frac{x}{14.33} * 100\% \approx 88.6\%$

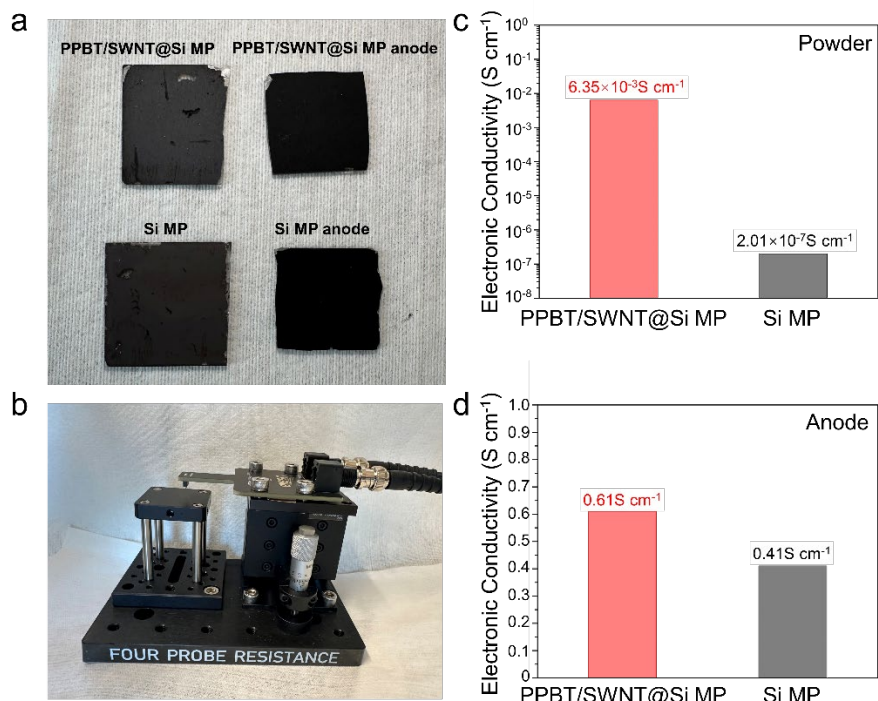

**Figure S9.** (a) Digital image of PPBT/SWNT@Si MPs and Si MPs, and the related anodes coated on glass substrate. (b) 4-point probe test equipment. (c) Electronic conductivity of PPBT/SWNT@Si MP and Si MP. (d) Electronic conductivity of PPBT/SWNT@Si MP and Si MP anodes.

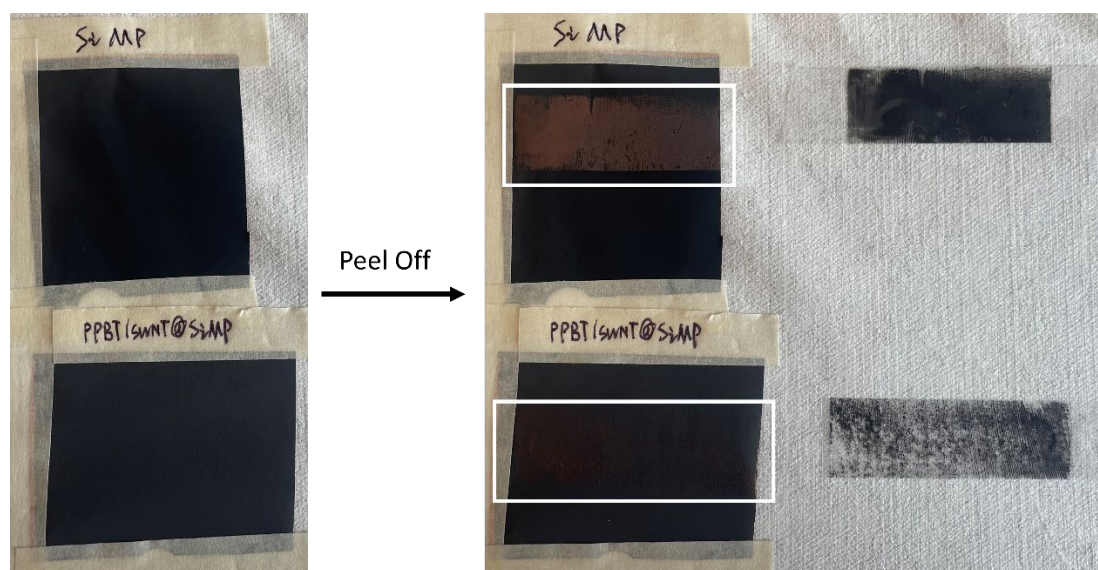

**Figure S10.** Electrode peel-off experiment for both Si MP and PPBT/SWNT@Si MP anode.

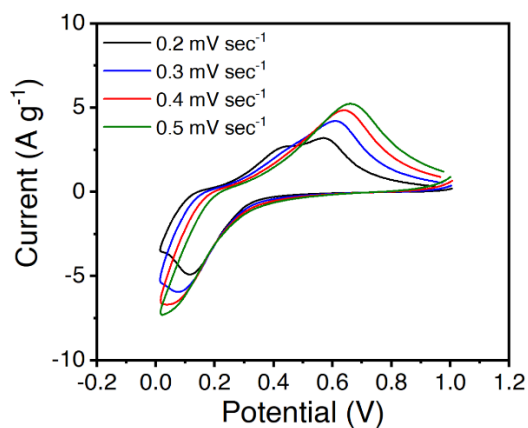

**Figure S11.** Oxidation/reduction voltage profiles of Si MP anodes at a various scan rate from 0.2 to 0.5 mV s<sup>-1</sup>.

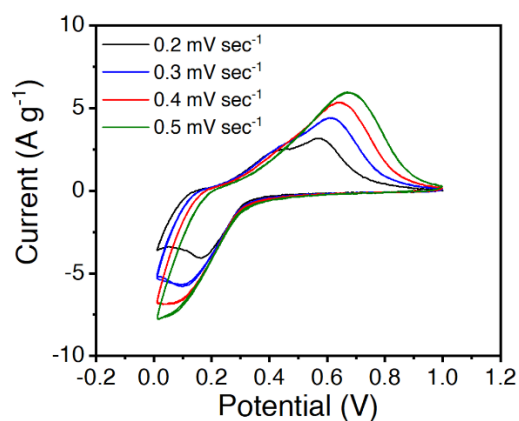

**Figure S12.** Oxidation/reduction voltage profiles of PPBT/SWNT@Si MP anodes at a various scan rate from 0.2 mV s<sup>-1</sup> to 0.5 mV s<sup>-1</sup>.

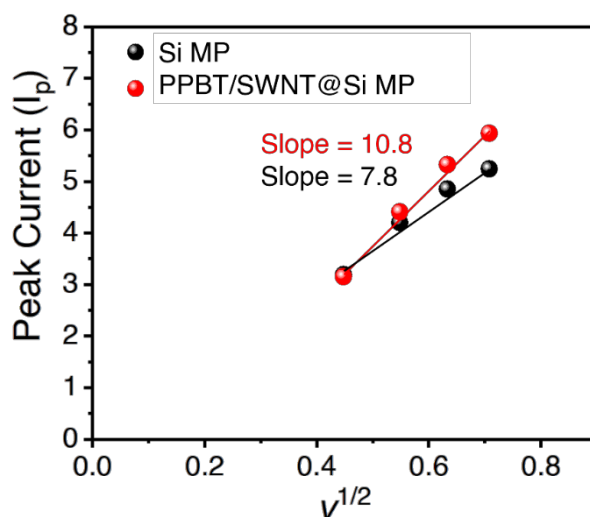

**Figure S13.** The relationship of peak current and the square root of scan rate ( $v^{1/2}$ ) for anodic peaks of Si MP and PPBT/SWNT@Si MP anodes.

**Table S2.** Comparison of ICE of previously reported Si-based anodes.

| Materials                                                       | ICE (%) | Binder                      | Reference |
|-----------------------------------------------------------------|---------|-----------------------------|-----------|
| Si/mesoporous carbon/crystalline TiO <sub>2</sub> nanoparticles | 73 %    | PAA                         | 1         |
| Carbon-coated ant-nest-like microscale porous silicon           | 80.3 %  | Sodium alginate             | 2         |
| Si/Ti <sub>3</sub> C <sub>2</sub> Mxene composite               | 61.1 %  | PVDF                        | 3         |
| 3D N-doped graphene@Si@Hybrid Silicate                          | 74.9 %  | /                           | 4         |
| MXene-Si-CNT composite                                          | 70.38 % | CMC                         | 5         |
| Carbon-coated metallurgical Silicon/carbon nanofiber            | 73 %    | Sodium alginate             | 6         |
| poly(hexaazatrinaphthalene) coated Si/C microsized particles    | 81.29 % | Sodium alginate             | 7         |
| Microclusters of kinked silicon nanowires                       | 82.4 %  | PAA                         | 8         |
| Nano Si                                                         | 81.6%   | Self-healing polymer binder | 9         |
| PPBT@CNT/Si MPs                                                 | 85 %    | PAA/PVA                     | This work |

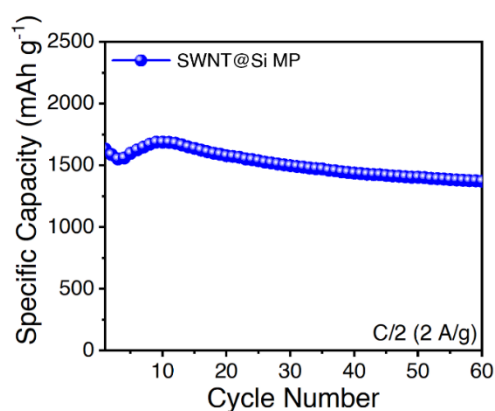**Figure S14.** SWNT@Si MP anodes cycle performance at a current density of 2 A g<sup>-1</sup>.



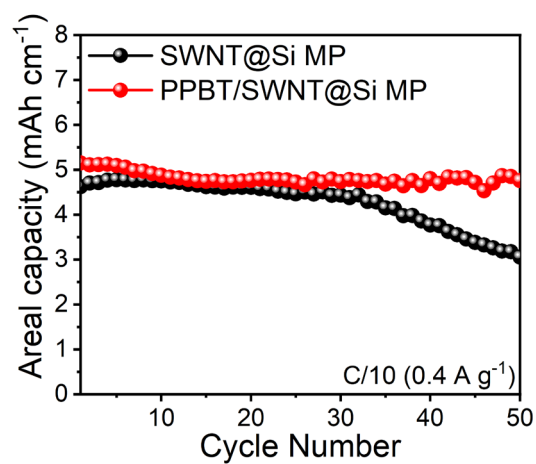

**Figure S15.** High mass loading ( $\sim 2\text{mg cm}^{-2}$ ) PPBT/SWNT@Si MP and SWNT@Si MP anodes cycle performance at a current density of  $0.4\text{ A g}^{-1}$ .

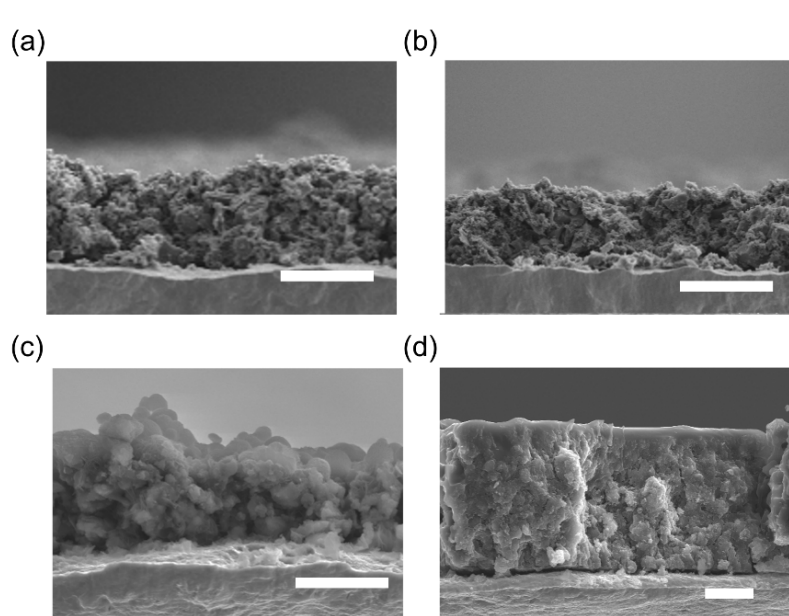

**Figure S16.** Cross-sectional image of PPBT/SWNT@Si MP and Si MP anode (a, b) before and (c, d) after cycling. (Scale bar:  $10\text{ }\mu\text{m}$ )

**Table S3.** Comparison of the initial capacity and capacity decay rate of previously reported nano-silicon anodes.

| <b>Materials</b>                                                | <b>Current Rate/<br/>Density</b> | <b>Initial Capacity<br/>(mAh/g)</b> | <b>Capacity<br/>decay rate<br/>(%)</b> | <b>Reference</b> |
|-----------------------------------------------------------------|----------------------------------|-------------------------------------|----------------------------------------|------------------|
| <b>Binders</b>                                                  |                                  |                                     |                                        |                  |
| Si nanoparticle/<br>double carbon matrix                        | 0.2 C                            | ≈ 1500                              | 0.040 %                                | 10               |
| PAA                                                             |                                  |                                     |                                        |                  |
| Si nanoparticle/<br>zeolite imidazolate<br>frameworks           | 1A/g                             | ≈ 2800                              | ≈ 0.084 %                              | 11               |
| PVDF                                                            |                                  |                                     |                                        |                  |
| Si nanoparticle                                                 | 4.2 A/g                          | ≈ 1016                              | 0.058 %                                | 12               |
| PVDF/ self-healing<br>poly(ether-thioureas)                     |                                  |                                     |                                        |                  |
| Si nanoparticle/ 50 nm<br>void mesoporous yolk-<br>shell carbon | 0.42 A/g                         | 1272                                | 0.054 %                                | 13               |
| CMC                                                             |                                  |                                     |                                        |                  |
| Si nanotube                                                     | 1 A/g                            | 2197                                | 0.047 %                                | 14               |
| Sodium alginate                                                 |                                  |                                     |                                        |                  |
| Si nanosheet                                                    | 2 A/g                            | ≈ 2000                              | 0.050 %                                | 15               |
| CMC/SBR                                                         |                                  |                                     |                                        |                  |
| Si nanoparticle/<br>hollow porous carbon/<br>graphene           | 0.1 A/g                          | 1556                                | 0.165 %                                | 16               |
| CMC                                                             |                                  |                                     |                                        |                  |
| Silicon particle                                                | 2 A/g                            | 2461                                | 0.13%                                  | 17               |
| PAA/gelatin/β-<br>cyclodextrin cross-link<br>polymer            |                                  |                                     |                                        |                  |
| Si microparticle/<br>PPBT/SWNT                                  | 2 A/g                            | 2063                                | 0.027 %                                | This work        |
| PAA/PVA                                                         |                                  |                                     |                                        |                  |

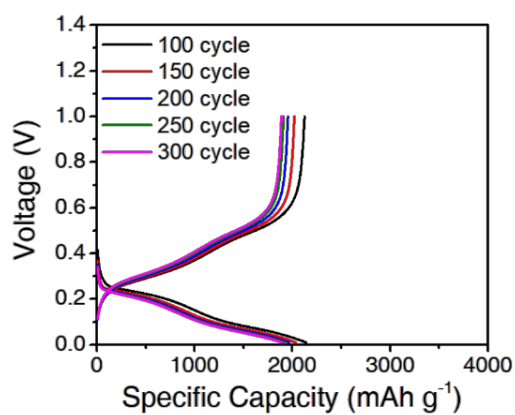

**Figure S17.** Charge/discharge voltage profiles of PPBT/SWNT@Si MPs at a current density of 2 A g<sup>-1</sup> for 300 cycles.

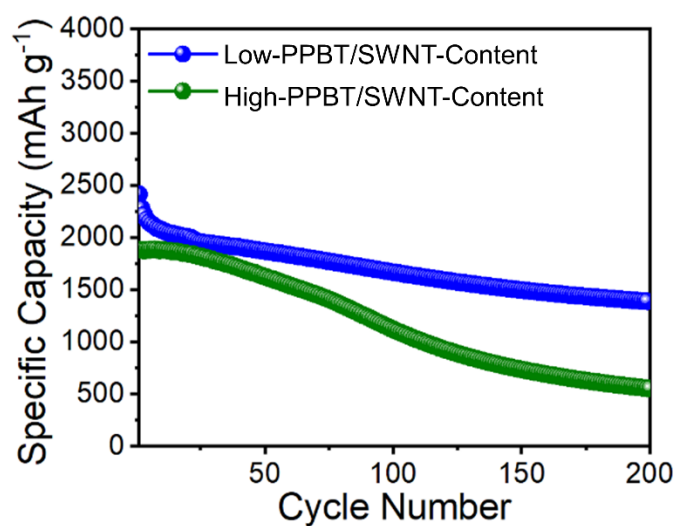

**Figure S18.** Cycle performance of PPBT/SWNT@Si MP anodes with different PPBT/SWNT content.

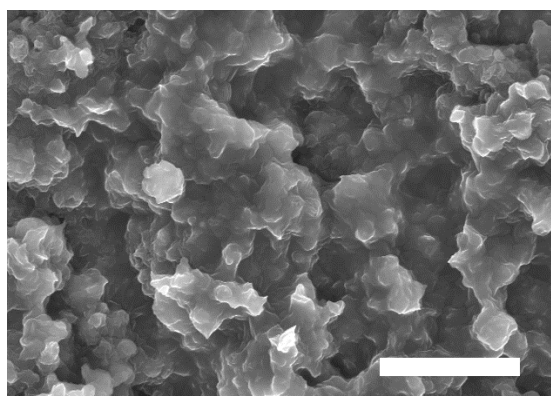

**Figure S19.** SEM images of higher PPBT/SWNT Si MP anode after cycling. (Scale bar: 10 μm)

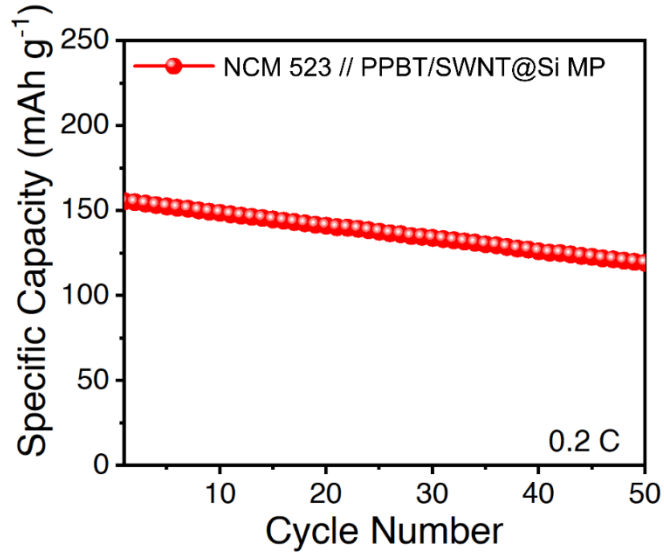

**Figure S20.** Cycle performance of NCM 523 // PPBT/SWNT@Si MP electrodes based full cell at 0.2 C.

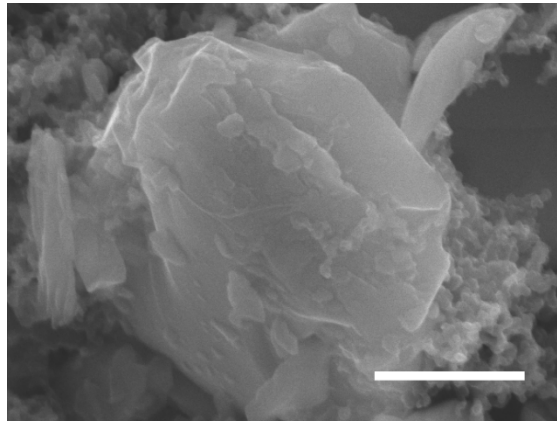

**Figure S21.** SEM image of SWNT/Si MP anodes. (Scale bar: 1  $\mu\text{m}$ )

The Raman shifts are converted to the strain on carbon nanotubes according to the equation below:

$$\Delta G = G - G_{OCV} - G \quad (\text{Equation S3})$$

Where  $G_{OCV}$  is the G-band position at open circuit voltage, and  $G$  is the G-band position during cycling.

$$F = -\frac{\Delta G}{8} \times 1.1 \text{ TPa} \times 1\% \quad (\text{Equation S4})$$

where  $\Delta G$  is the G-band shifts, and  $F$  is the strain on SWNT.

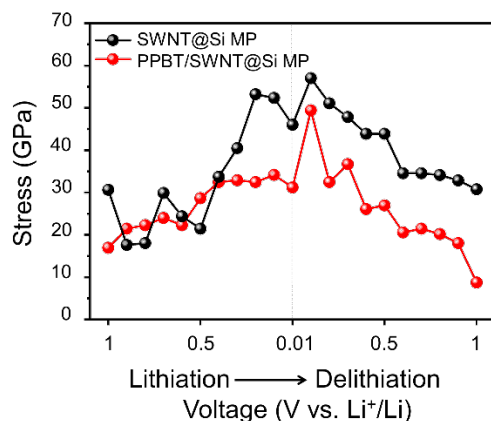

**Figure S22.** The corresponding stress for the SWNTs in the PPBT/SWNT@Si MP and SWNT@Si MP anodes during the 2<sup>nd</sup> cycle.

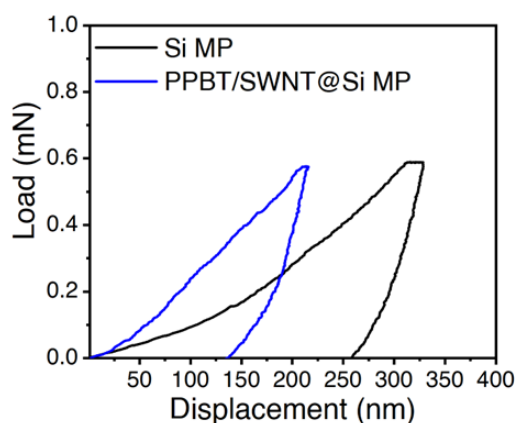

**Figure S23.** load-depth profiles of Si MP and PPBT/SWNT@Si MP electrodes with a maximum load of 0.6 mN.

## REFERENCES

1. Luo, W.; Wang, Y.; Wang, L.; Jiang, W.; Chou, S.-L.; Dou, S. X.; Liu, H. K.; Yang, J., Silicon/mesoporous carbon/crystalline TiO<sub>2</sub> nanoparticles for highly stable lithium storage. *ACS Nano* **2016**, *10* (11), 10524-10532.
2. An, W.; Gao, B.; Mei, S.; Xiang, B.; Fu, J.; Wang, L.; Zhang, Q.; Chu, P. K.; Huo, K., Scalable synthesis of ant-nest-like bulk porous silicon for high-performance lithium-ion battery anodes. *Nat. Commun.* **2019**, *10* (1), 1447.
3. Hui, X.; Zhao, R.; Zhang, P.; Li, C.; Wang, C.; Yin, L., Low-temperature reduction strategy synthesized Si/Ti<sub>3</sub>C<sub>2</sub> MXene composite anodes for high-performance Li-ion batteries. *Adv. Energy Mater.* **2019**, *9* (33), 1901065.
4. Huang, G.; Han, J.; Lu, Z.; Wei, D.; Kashani, H.; Watanabe, K.; Chen, M., Ultrastable silicon anode by three-dimensional nanoarchitecture design. *ACS Nano* **2020**, *14* (4), 4374-4382.
5. Liu, S.; Zhang, X.; Yan, P.; Cheng, R.; Tang, Y.; Cui, M.; Wang, B.; Zhang, L.; Wang, X.; Jiang, Y., Dual bond enhanced multidimensional

constructed composite silicon anode for high-performance lithium ion batteries. *ACS Nano* **2019**, *13* (8), 8854-8864.

6. Shen, C.; Fang, X.; Ge, M.; Zhang, A.; Liu, Y.; Ma, Y.; Mecklenburg, M.; Nie, X.; Zhou, C., Hierarchical carbon-coated ball-milled silicon: synthesis and applications in free-standing electrodes and high-voltage full lithium-ion batteries. *ACS Nano* **2018**, *12* (6), 6280-6291.

7. Wang, Q.; Zhu, M.; Chen, G.; Dudko, N.; Li, Y.; Liu, H.; Shi, L.; Wu, G.; Zhang, D., High-performance micro-sized Si anodes for lithium-ion batteries: insights into the polymer configuration conversion mechanism. *Adv. Mater.* **2022**, *34* (16), 2109658.

8. Jeong, Y. K.; Huang, W.; Vilá, R. A.; Huang, W.; Wang, J.; Kim, S. C.; Kim, Y. S.; Zhao, J.; Cui, Y., Microclusters of kinked silicon nanowires synthesized by a recyclable iodide process for high-performance lithium-ion battery anodes. *Adv. Energy Mater.* **2020**, *10* (41), 2002108.

9. Li, Z.; Wan, Z.; Zeng, X.; Zhang, S.; Yan, L.; Ji, J.; Wang, H.; Ma, Q.; Liu, T.; Lin, Z.; Ling, M.; Liang, C., A robust network binder via localized linking by small molecules for high-areal-capacity silicon anodes in lithium-ion batteries. *Nano Energy* **2021**, *79*, 105430.

10. Kwon, H. J.; Hwang, J. Y.; Shin, H. J.; Jeong, M. G.; Chung, K. Y.; Sun, Y. K.; Jung, H. G., Nano/Microstructured Silicon-Carbon Hybrid Composite Particles Fabricated with Corn Starch Biowaste as Anode Materials for Li-Ion Batteries. *Nano Lett* **2020**, *20* (1), 625-635.

11. Gao, R.; Tang, J.; Yu, X.; Tang, S.; Ozawa, K.; Sasaki, T.; Qin, L.-C., In situ synthesis of MOF-derived carbon shells for silicon anode with improved lithium-ion storage. *Nano Energy* **2020**, *70*, 104444.

12. Chen, H.; Wu, Z.; Su, Z.; Chen, S.; Yan, C.; Al-Mamun, M.; Tang, Y.; Zhang, S., A mechanically robust self-healing binder for silicon anode in lithium ion batteries. *Nano Energy* **2021**, *81*, 105654.

13. Yang, J.; Wang, Y.-X.; Chou, S.-L.; Zhang, R.; Xu, Y.; Fan, J.; Zhang, W.-x.; Kun Liu, H.; Zhao, D.; Xue Dou, S., Yolk-shell silicon-mesoporous carbon anode with compact solid electrolyte interphase film for superior lithium-ion batteries. *Nano Energy* **2015**, *18*, 133-142.

14. Wang, F.; Li, P.; Li, W.; Wang, D., Electrochemical Synthesis of Multidimensional Nanostructured Silicon as a Negative Electrode Material for Lithium-Ion Battery. *ACS Nano* **2022**, *16* (5), 7689-7700.

15. Ren, Y.; Xiang, L.; Yin, X.; Xiao, R.; Zuo, P.; Gao, Y.; Yin, G.; Du, C., Ultrathin Si Nanosheets Dispersed in Graphene Matrix Enable Stable Interface and High Rate Capability of Anode for Lithium-ion Batteries. *Adv. Funct. Mater.* **2022**, *32* (16), 2110046.

16. Chen, H.; He, S.; Hou, X.; Wang, S.; Chen, F.; Qin, H.; Xia, Y.; Zhou, G., Nano-Si/C microsphere with hollow double spherical interlayer and submicron porous structure to enhance performance for lithium-ion battery anode. *Electrochimica Acta* **2019**, *312*, 242-250.

17. Ye, R.; Liu, J.; Tian, J.; Deng, Y.; Yang, X.; Chen, Q.; Zhang, P.; Zhao, J., Novel Binder with Cross-Linking Reconfiguration Functionality for Silicon Anodes of Lithium-Ion Batteries. *ACS Appl Mater Interfaces* **2024**, *16* (13), 16820-16829.
